# Supplementary material
Source: PubMed Central journal article supplement (PMC7279755)

# THE LANCET

## Microbe

### **Supplementary appendix**

This appendix formed part of the original submission and has been peer reviewed. We post it as supplied by the authors.

Supplement to: Majid F, Omer S B, Khwaja A I. Optimising SARS-CoV-2 pooled testing for low-resource settings. *Lancet Microbe* 2020; published online June 8. [https://doi.org/10.1016/S2666-5247\(20\)30056-2](https://doi.org/10.1016/S2666-5247(20)30056-2).

Appendix

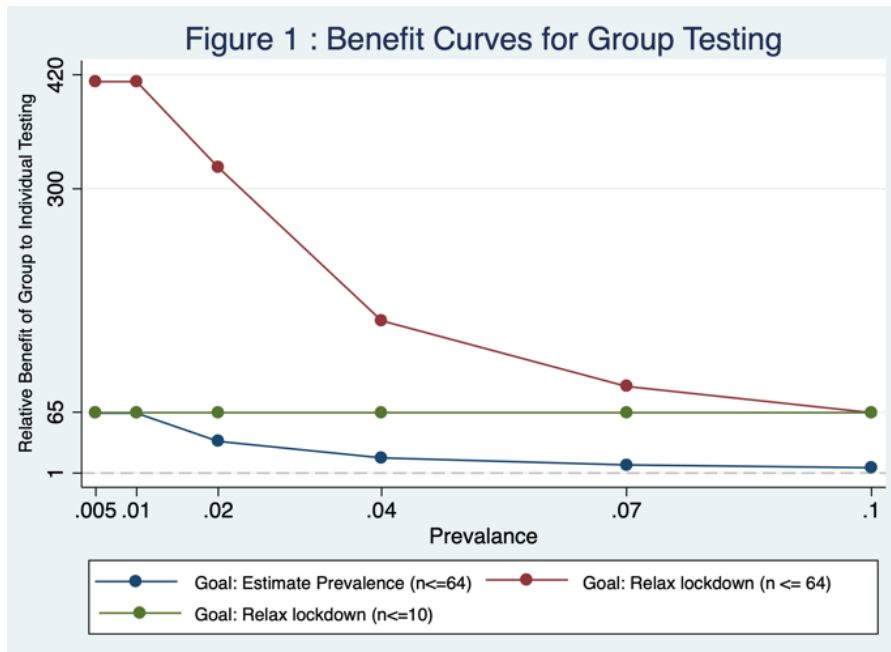

Supplement: mmc1.pdf [file mmc1.pdf]
